# Supplementary material for: Efficacy and safety of peficitinib (ASP015K) in patients with rheumatoid arthritis and an inadequate response to methotrexate: results of a phase III randomised, double-blind, placebo-controlled trial (RAJ4) in Japan
Source: PubMed Central journal article supplement — Ann Rheum Dis. 2019 Jul 26;78(10):1305–19. doi: 10.1136/annrheumdis-2019-215164 (PMC6788880; doi:10.1136/annrheumdis-2019-215164), 2019-07-26
Supplement: annrheumdis-2019-215164supp001.pdf [file annrheumdis-2019-215164supp001.pdf]

## 1 **ONLINE SUPPLEMENTARY MATERIALS**

## 2 **SUPPLEMENTARY METHODS**

### 3 **Randomisation and blinding**

4 All drug numbers were assigned randomly by the Case Registration Center under blind  
5 conditions, using an Interactive Web Response System. Treatment allocation to the placebo  
6 or peficitinib 100 mg or 150 mg groups was double-blinded. The peficitinib 100 mg or  
7 peficitinib 150 mg tablets and their corresponding placebo tablets were indistinguishable  
8 from each other. The packaging for each treatment group (peficitinib 100 mg or 150 mg and  
9 placebo) was also visually indistinguishable from that of other groups. The treatment code  
10 was only known to the person responsible for assigning study drugs, the person appointed at  
11 the institution performing measurements of plasma drug concentrations, persons in the  
12 safety control division (as necessary for suspected unexpected serious adverse reaction  
13 handling), and the independent data and safety monitoring board.

### 14 **Patient inclusion criteria**

15 A patient was eligible for study participation if all of the following applied:

- 16 1. Had received a full explanation of the study drug and this study in advance and provided  
17 written informed consent to participate in the study.
- 18 2. Male or female aged  $\geq 20$  years at the time of informed consent.
- 19 3. Had RA of  $< 10$  years duration at baseline, fulfilling the 1987 ACR criteria or the 2010  
20 ACR/European League Against Rheumatism (EULAR) criteria.
- 21 4. Did not receive the following drugs or received the drugs with stable dosage for at least 28  
22 days prior to the baseline (start of treatment) for RA treatment: NSAIDs (excluding topical  
23 formulations with a local action), oral morphine or equivalent opioid analgesics ( $\leq 30$  mg/day),  
24 acetaminophen, or oral corticosteroids ( $\leq 10$  mg/day in prednisolone equivalent).
- 25 5. At screening, patient had active RA as evidenced by both of the following:
  - 26 •  $\geq 6$  tender/painful joints (using 68-joint assessment)
  - 27 •  $\geq 6$  swollen joints (using 66-joint assessment)
- 28 6. CRP (latex agglutination test) of  $\geq 1.00$  mg/dL at screening.

- 29 7. Met the ACR 1991 Revised Criteria for the Classification of Global Functional Status in RA  
30 Class I, II, or III at screening.
- 31 8. Had inadequate response to MTX that was continuously administered for at least 90 days  
32 prior to screening and MTX  $\geq 8$  mg/week for at least 28 days prior to baseline. However, an  
33 inadequate responder to MTX  $< 8$  mg/week was also eligible if intolerance precluded a dose  
34 increase.
- 35 9. Was able to continue a stable dose of MTX (a maximum of 16 mg/week) from at least 28  
36 days prior to screening until the end of treatment (EOT).
- 37 10. Had bone erosion at the joint (as evidenced by X-rays of hands and feet within 90 days  
38 prior to baseline) assessed using mTSS, and either positive anti-cyclic citrullinated peptide  
39 (CCP) antibody  $\geq 4.5$  U/mL or positive rheumatoid factor  $> 15$  IU/mL at screening:
- 40 11. Willing and able to comply with the study requirements.

#### 41 **Patient exclusion criteria**

42 A patient was excluded from participation if any of the following applied:

- 43 1. Had received a biological DMARD within the following specified periods:
- 44 • Etanercept: within 28 days prior to baseline
  - 45 • Adalimumab, infliximab: within 56 days prior to baseline
  - 46 • Golimumab, certolizumab pegol: within 70 days prior to baseline
  - 47 • Abatacept, tocilizumab: within 84 days prior to baseline
  - 48 • Denosumab: within 150 days prior to baseline
  - 49 • Rituximab: within 180 days prior to baseline
- 50 2. Had an inadequate response to a biological DMARD as determined by the  
51 investigator/subinvestigator.
- 52 3. Had received a non-biological DMARD listed below or other drugs used in the treatment of  
53 RA within 28 days prior to baseline. Leflunomide was prohibited within 180 days prior to  
54 baseline. Alternatively, leflunomide was prohibited within 28 days prior to baseline if washout  
55 with cholestyramine for at least 17 days was completed at least 28 days prior to baseline.  
56 However, topical drugs other than those for the treatment of RA could be used  
57 concomitantly.
- 58 • Salazosulfapyridine
  - 59 • Lobenzarit

- 60 • Gold
  - 61 • Iguratimod
  - 62 • D-penicillamine
  - 63 • Bucillamine
  - 64 • Actarit
  - 65 • Leflunomide
  - 66 • Tacrolimus
  - 67 • Cyclosporine
  - 68 • Cyclophosphamide
  - 69 • Azathioprine
  - 70 • Minocycline
  - 71 • Mizoribine
- 72 4. Had received tofacitinib and other JAK inhibitors (including other investigational drugs).
- 73 5. Had received intra-articular, intravenous, intramuscular, or endorectal (excluding  
74 suppositories in patients with anal diseases) corticosteroid within 28 days prior to baseline.
- 75 6. Had participated in any study of peficitinib and had received peficitinib or placebo.
- 76 7. Had received other investigational drugs within 90 days or within five half-lives, whichever  
77 was longer, prior to baseline.
- 78 8. Had received plasma exchange therapy within 60 days prior to baseline.
- 79 9. Had undergone joint drainage, had received local anaesthesia and nerve block, or had  
80 received articular cartilage protectant at the assessed joint within 28 days prior to baseline.
- 81 10. Had undergone surgery and had residual effects in the assessed joints at the discretion  
82 of investigator/subinvestigator, or was scheduled to undergo surgery that could affect the  
83 study evaluation of the assessed joints at the discretion of investigator/subinvestigator.
- 84 11. Had a diagnosis of inflammatory arthritis (psoriatic arthritis, ankylosing spondylitis,  
85 systemic lupus erythematosus, sarcoidosis, etc.) other than RA.
- 86 12. Any of the following laboratory values during the screening test period:
- 87 • Haemoglobin <9.0 g/dL
  - 88 • Absolute neutrophil count <1000/ $\mu$ L

- 89 • Lymphocyte count <800/ $\mu$ L
- 90 • Platelet count <75000/ $\mu$ L
- 91 • Alanine aminotransferase (ALT)  $\geq 2 \times$  upper limit of normal (ULN)
- 92 • Aspartate aminotransferase (AST)  $\geq 2 \times$  ULN
- 93 • Total bilirubin  $\geq 1.5 \times$  ULN
- 94 • Estimated glomerular filtration rate (eGFR)  $\leq 40$  mL/min as measured by the  
95 modification of diet in renal disease method
- 96 •  $\beta$ -D-glucan  $\geq 11$  pg/mL
- 97 • Positive hepatitis B surface (HBs) antigen, hepatitis B core (HBc) antibody, HBs  
98 Antibody, or HBV-DNA quantitation (however, a patient with negative HBs antigen  
99 and HBV-DNA quantitation, and positive HBc antibody, HBs antibody, or both was  
100 eligible if HBV-DNA was monitored by HBV-DNA quantitation at every scheduled visit  
101 after initiation of study drug administration.)
- 102 • Positive hepatitis C virus antibody
- 103 13. Had a history of or concurrent active tuberculosis. Eligibility criteria for tuberculosis are  
104 described below:

| History of active tuberculosis | Chest X-ray (for tuberculosis) | Tuberculosis infection <sup>†</sup> | Exposure to patients with infective tuberculosis (interview) | Eligibility                                    |
|--------------------------------|--------------------------------|-------------------------------------|--------------------------------------------------------------|------------------------------------------------|
| Present                        | -                              | -                                   | -                                                            | Not eligible                                   |
|                                | Abnormal (active)              | -                                   | -                                                            | Not eligible                                   |
|                                | Abnormal (old)*                | -                                   | Exposed or not exposed                                       | Eligible if prophylaxis was given <sup>‡</sup> |
| Absent                         |                                | Positive                            | Exposed or not exposed                                       | Eligible if prophylaxis was given <sup>‡</sup> |
|                                | Normal                         |                                     | Exposed                                                      | Eligible if prophylaxis was given <sup>‡</sup> |
|                                |                                | Negative                            | Not exposed                                                  | Eligible                                       |

105 \*Evidence of old tuberculosis was determined if chest X-ray revealed pleural thickening, band-like shadow and  
106 calcification  $\geq 5$  mm. Chest X-ray within 90 days prior to baseline could substitute for the screening test.

107 †T-spot or Quantiferon Gold test was first priority. When the result was equivocal or invalid, retest including other  
108 test methods were allowed. If a retest was not performed, criteria for positive results were followed. When T-spot  
109 or Quantiferon Gold test was not feasible, tuberculin test was performed. Tuberculin was defined as positive with  
110 a red spot covering an area of 20 mm or more, or induration. Tests conducted within 90 days prior to baseline  
111 could be used for diagnosis.

112 ‡Patient had to receive or had received prophylaxis with isoniazid or rifampicin. Prophylaxis was administered for  
113 6 to 9 months, starting from at least 21 days prior to baseline.

114 14. Met any of the following in terms of infections except for tuberculosis:

- 115 • History of or concurrent severe herpes zoster (associated with Hunt syndrome or  
116 having ulcerative lesions) or disseminated herpes zoster
- 117 • History of multiple recurrences (at least twice) of localised herpes zoster
- 118 • Serious infection requiring hospitalisation within 90 days prior to baseline
- 119 • Had received intravenous antibiotics within 90 days prior to baseline (prophylactic  
120 antibiotics were allowed).
- 121 • Had a high risk of infection (e.g., patient with urinary catheter) at the discretion of  
122 investigator/subinvestigator

123 15. Had a history of or concurrent interstitial pneumonia and the investigator/subinvestigator  
124 judged that it was inappropriate for the patient to participate in this study.

125 16. Had a history of or concurrent malignant tumour (except for successfully treated basal  
126 cell carcinoma).

127 17. Had received live or live attenuated virus vaccination within 56 days prior to baseline  
128 (inactivated vaccines including influenza and pneumococcal vaccines were allowed).

129 18. Had any ongoing severe, progressive or uncontrolled renal, hepatic, haematological,  
130 gastrointestinal, metabolic, endocrine, pulmonary, cardiac, neurological, infectious, or  
131 autoimmune disease except for RA (excluding Sjogren's syndrome and chronic thyroiditis),  
132 or any ongoing illness that would make the patient unsuitable for the study as determined by  
133 the investigator/subinvestigator.

134 19. Had had a history of clinically significant allergy. Clinically significant allergy includes  
135 allergies such as systemic urticaria induced by specific antigens and drugs, anaphylaxis, and  
136 allergy associated with shock necessitating hospitalised treatment.

137 20. Had received medications that were cytochrome P450 (CYP) 3A substrates with narrow  
138 therapeutic range within 14 days prior to baseline. These medications included  
139 dihydroergotamine, ergotamine, fentanyl, pimozone, quinidine, temsirolimus and  
140 disopyramide.

141 21. Had (or had history of) concurrent cardiac failure, defined as New York Heart Association  
142 Classification Class III or higher.

- 143 22. Had (or had history of) concurrent prolonged QT syndrome. Patient had prolonged QT  
144 interval (defined as QTc  $\geq$ 500 msec; a patient with QTc  $\geq$ 500 msec at retest was excluded)  
145 at screening.
- 146 23. Had (or had history of) congenital short QT syndrome. Patient had shortened QT interval  
147 (defined as QTc  $<$ 330 msec; a patient with QTc  $<$ 330 msec at retest was excluded) at  
148 screening.
- 149 24. Had a history of positive human immunodeficiency virus infection.
- 150 25. Female patient who was pregnant or might be pregnant, was nursing, wished to  
151 conceive for a period running from the time informed consent was given until 60 days after  
152 the EOT, or for whom the possibility of pregnancy could not be excluded as a result of the  
153 serum pregnancy test given at the time of screening.
- 154 26. Male patient who could not practice at least two types of contraception from the time of  
155 informed consent to 90 days after the EOT, or a female patient of childbearing potential who  
156 could not practice at least 2 types of contraception from the time of informed consent to 60  
157 days after the EOT.
- 158 27. Male patient who did not agree not to donate sperm from the time of informed consent to  
159 90 days after the EOT, or a female patient who did not agree not to donate ova from the time  
160 of informed consent to 60 days after the EOT.
- 161 28. Had been judged unsuitable to participate in the study for other reasons by the  
162 investigator/subinvestigator.
- 163 29. Had a history or complication of lymphatic diseases such as lymphoproliferative disorder,  
164 lymphoma, and leukaemia.

165

**166 Closed testing procedure**

167 The following closed testing procedure was used for multiplicity adjustment in the primary  
168 analysis:

- 169 • Step 1: ACR20 response at Week 12/ET; peficitinib 150 mg vs placebo
- 170 • Step 2: ACR20 response at Week 12/ET; peficitinib 100 mg vs placebo
- 171 • Step 3: mTSS change from baseline at Week 28/ET; peficitinib 150 mg vs placebo
- 172 • Step 4: mTSS change from baseline at Week 28/ET; peficitinib 100 mg vs placebo

173 The null hypothesis at Step 1 was tested at a significance level of 0.05. If this was  
174 statistically significant, the next step was initiated. The absence of statistical significance led  
175 to completion of the hypothesis test. These hypothesis tests continued up to Step 4 unless it  
176 was rejected.

177

**178 Assessments**

179 Individual van der Heijde-mTSS bone erosion scores were derived as follows: digital  
180 radiographic images were stripped of electronic header information (e.g. subject identifiers,  
181 time point of assessment) to ensure blinding and replaced with a unique site and subject  
182 identifier. A visual QC review of the overall quality of digital images was performed prior to  
183 each image being read. Two readers at a central facility read the images independently. The  
184 mean mTSS was obtained from the scores given by the two primary readers if no  
185 adjudication was necessary, or the mean of the scores given by all three readers  
186 (adjudicator and the two primary readers) if adjudication was performed. If one reader's  
187 mTSS was not available owing to an inadequate image at a given time point, the mean  
188 mTSS at this time point was obtained from the mean of the two remaining readers' scores. If  
189 an image for a patient was adjudicated and only two readers had adequate baseline images,  
190 these two readers' scores were used to calculate the combined mTSS and change scores  
191 for all time points, even though the third reader may have had adequate follow-up time point  
192 images. If an image for a patient was adjudicated and only one reader had adequate  
193 baseline images, all the time point images, mTSS and change scores, including baseline  
194 and follow-up time points, were set as 'missing', even though follow-up time points may have  
195 been adequate for all three readers. Overall, 31/519 (6%) radiographic readings required  
196 input from an adjudicator. This was considered within the predefined quality threshold of  
197 <15%, confirming agreement between the readers. The inter-reader SDC at Week 28 was  
198 2.8.

**199 Statistical analyses**

200 For the assessment of joint destruction in patients who discontinued at or before Week 28  
201 (after Day 48), or for patients treated initially with placebo and who switched due to lack of  
202 efficacy to peficitinib at Week 12, mTSS at Week 28 (Day 197) was extrapolated using a  
203 linear extrapolation method based on the mTSS at baseline and early termination (after Day  
204 48) or Week 12 (Day 85) (before switching).

205 With regard to missing data for mTSS, erosion score and joint space narrowing score,  
206 scores were imputed by linear extrapolation at Week 28/ET (Week 28 evaluation: Day 197).

207 1) For patients who discontinued at or before Week 28 (after Day 48) or for patients  
208 initially treated with placebo and who switched to peficitinib at Week 12 owing to lack  
209 of efficacy, mTSS at Week 28 (Day 197) was extrapolated using a linear

210 extrapolation method based on the mTSS at baseline and early termination (after  
211 Day 48) or Week 12 (Day 85), i.e., before switching.

212 2) For patients who were initially treated with placebo, if measurement data were  
213 available at Week 28 (from Days 160 to 234) and patients had not yet been switched  
214 to peficitinib, then actual data were used (no imputation performed).

215 3) For the Week 52 (Day 365) evaluation, described as Week 52/ET, the score was  
216 extrapolated based on scores at baseline and early termination (after Day 48) or  
217 Week 12/Week 28, i.e., before switching for those patients initially on placebo.

218 4) If measurement data were available at Week 52 (from Days 328 to 402) and a patient  
219 was not initially randomised to placebo, then actual data were used (no imputation  
220 performed).

221 In the primary analysis of mean change from baseline of mTSS at Week 28/ET, 481 of 518  
222 contributed radiographic scores at Week 28/ET. Of these 481 patients, 392 had observed  
223 data at Week 28 while the remaining 89 patients had imputed data by linear extrapolation.

224



225 **SUPPLEMENTARY RESULTS**226 **Narrative**

227 The death by suicide of a 69-year-old male in the placebo group was reported 18 weeks  
228 after the Week-28 switch to peficitinib 100 mg. The patient received peficitinib concomitantly  
229 with oral MTX (at a dose of 10 mg/week) until his death. The patient's medical history  
230 reported the presence of osteoporosis, hyperlipidaemia, depression and insomnia. Other  
231 concomitant medications reported at the start of study treatment included folic acid,  
232 esomeprazole magnesium, isoniazid, alendronate sodium, fluvoxamine maleate, alprazolam,  
233 simvastatin, zopiclone, triazolam, amitriptyline hydrochloride, mirtazapine, pyridoxal  
234 phosphate and prednisolone. Adverse events experienced by the patient during the study  
235 included thermal burns to the right hand, constipation and lower back pain. The death was  
236 considered by the investigator to be unrelated to the study drug owing to the patient's  
237 diagnosis of depression.

238

239

## SUPPLEMENTARY TABLES

**Supplementary Table 1** Sensitivity analysis of ACR20 response at Week 12/ET (LOCF and non-responder imputation, FAS)

|                                                                                          | Responders, n (%) | Treatment difference versus placebo |                         |                      |
|------------------------------------------------------------------------------------------|-------------------|-------------------------------------|-------------------------|----------------------|
|                                                                                          |                   | Difference (%) <sup>*</sup>         | 95% CI (%) <sup>†</sup> | P value <sup>‡</sup> |
| <b>ACR20 response at Week 12/ET (LOCF and non-responder imputation;<sup>§</sup> FAS)</b> |                   |                                     |                         |                      |
| Placebo (N=170)                                                                          | 37 (21.8)         | -                                   | -                       | -                    |
| Peficitinib 100 mg (N=174)                                                               | 100 (57.5)        | 35.7                                | 25.5, 45.9              | <0.001               |
| Peficitinib 150 mg (N=174)                                                               | 110 (63.2)        | 41.5                                | 31.4, 51.5              | <0.001               |
| <b>ACR20 response at Week 12/ET (observed data;<sup>  </sup> FAS)</b>                    |                   |                                     |                         |                      |
| Placebo (N=159)                                                                          | 37 (23.3)         | -                                   | -                       | -                    |
| Peficitinib 100 mg (N=168)                                                               | 100 (59.5)        | 36.3                                | 25.7, 46.8              | <0.001               |
| Peficitinib 150 mg (N=166)                                                               | 110 (66.3)        | 43.0                                | 32.6, 53.4              | <0.001               |

CI, confidence interval; FAS, full analysis set; N, total number of responders and non-responders (percentages based on N). Patients with missing data for all baseline ACR components were not included in percentages because ACR20 response could not be calculated.

<sup>\*</sup>Difference in proportion of responders (each active group minus placebo)

<sup>†</sup>CI based on normal approximation to the binomial distribution (continuity corrected)

<sup>‡</sup>Fisher's exact test. No multiplicity adjustment

<sup>§</sup>ACR components were LOCFed first and then ACR20 response was calculated. If ACR20 response was missing, then non-responder imputation was performed for missing ACR20 response

<sup>||</sup>ACR20 response was calculated using data as reported in study database

**Supplementary Table 2** Sensitivity analysis of change from baseline in van der Heijde-mTSS at Week 28 (observed data) and Week 28/ET (linear extrapolation [ANCOVA]), FAS

|                                                            | Mean (SD)     | Treatment difference versus placebo |              |          |
|------------------------------------------------------------|---------------|-------------------------------------|--------------|----------|
|                                                            |               | LS mean (SE)                        | 95% CI (%)   | P value* |
| <b>Baseline, observed data<sup>†</sup></b>                 |               |                                     |              |          |
| Placebo (N=169)                                            | 28.40 (36.28) | -                                   | -            | -        |
| Peficitinib 100 mg (N=173)                                 | 25.23 (35.50) | -                                   | -            | -        |
| Peficitinib 150 mg (N=174)                                 | 25.00 (32.38) | -                                   | -            | -        |
| <b>Week 28, observed data<sup>†</sup></b>                  |               |                                     |              |          |
| Placebo (N=73)                                             | 35.29 (34.60) | -                                   | -            | -        |
| Peficitinib 100 mg (N=159)                                 | 26.85 (36.80) | -                                   | -            | -        |
| Peficitinib 150 mg (N=160)                                 | 26.42 (32.63) | -                                   | -            | -        |
| <b>Week 28 change, observed data<sup>†</sup></b>           |               |                                     |              |          |
| Placebo (N=73)                                             | 2.72 (4.78)   | -                                   | -            | -        |
| Peficitinib 100 mg (N=159)                                 | 1.59 (4.25)   | -                                   | -            | 0.082    |
| Peficitinib 150 mg (N=160)                                 | 1.01 (2.88)   | -                                   | -            | 0.002    |
| <b>Week 28/ET, linear extrapolation<sup>‡</sup></b>        |               |                                     |              |          |
| Placebo (N=153)                                            | 33.14 (39.16) | -                                   | -            | -        |
| Peficitinib 100 mg (N=164)                                 | 27.11 (36.84) | -                                   | -            | -        |
| Peficitinib 150 mg (N=164)                                 | 26.01 (32.34) | -                                   | -            | -        |
| <b>Week 28/ET change, linear extrapolation<sup>‡</sup></b> |               |                                     |              |          |
| Placebo (N=153)                                            | 3.37 (5.46)   | -                                   | -            | -        |
| Peficitinib 100 mg (N=164)                                 | 1.62 (4.23)   | -1.69 (0.48)                        | -2.63, -0.75 | <0.001   |
| Peficitinib 150 mg (N=164)                                 | 1.03 (2.86)   | -2.27 (0.48)                        | -3.22, -1.33 | <0.001   |

ANCOVA, analysis of covariance; CI, confidence interval; ET, early termination; FAS, full analysis set; LS, least squares; SD, standard deviation; SE, standard error.

Higher mTSS indicates greater disease activity.

\*For observed data, p values were based on rank analysis of covariance model: rank of mTSS change = treatment + baseline rank of mTSS. For data derived by linear extrapolation, p values were based on analysis of covariance model for Week 28/ET change: change from baseline at Week 28/ET = treatment + baseline value

<sup>†</sup>Patients who discontinued at or before Week 28 or who switched to receive peficitinib instead of placebo at Week 12 due to lack of efficacy were not included in the observed data sensitivity analysis

<sup>‡</sup>For patients who discontinued at or before Week 28 or who were switched to receive peficitinib

instead of placebo at Week 12 due to lack of efficacy, mTSS at Week 28/ET was extrapolated using a linear extrapolation method based on the mTSS at baseline and early termination or Week 12 (Day 85) (before switching)

**Supplementary Table 3** Number of patients with ACR20, ACR50 and ACR70 responses, and HAQ-DI scores over time (FAS)

| Outcome           | Treatment group    | Week         |               |                |                |                 |
|-------------------|--------------------|--------------|---------------|----------------|----------------|-----------------|
|                   |                    | 0 (baseline) | 4             | 8              | 12             | 52              |
| ACR20, n/N (%)    | Placebo            | -            | 27/164 (16.5) | 33/161 (20.5)  | 37/159 (23.3)  | -               |
|                   | Peficitinib 100 mg | -            | 65/170 (38.2) | 86/168 (51.2)  | 100/168 (59.5) | 123/145 (84.8)  |
|                   | Peficitinib 150 mg | -            | 82/170 (48.2) | 103/166 (62.0) | 110/166 (66.3) | 128/147 (87.1)  |
| ACR50, n/N (%)    | Placebo            | -            | 5/164 (3.0)   | 9/161 (5.6)    | 13/159 (8.2)   | -               |
|                   | Peficitinib 100 mg | -            | 17/170 (10.0) | 33/168 (19.6)  | 50/168 (29.8)  | 97/145 (66.9)13 |
|                   | Peficitinib 150 mg | -            | 27/170 (15.9) | 55/166 (33.1)  | 80/166 (48.2)  | 100/147 (68.0)  |
| ACR70, n/N (%)    | Placebo            | -            | 1/164 (0.6)   | 1/161 (0.6)    | 4/159 (2.5)    | -               |
|                   | Peficitinib 100 mg | -            | 2/170 (1.2)   | 13/168 (7.7)   | 21/168 (12.5)  | 57/145 (39.3)   |
|                   | Peficitinib 150 mg | -            | 7/170 (4.1)   | 23/166 (13.9)  | 41/166 (24.7)  | 77/147 (52.4)   |
| HAQ-DI, mean (SD) | Placebo            | 1.05 (0.66)  | 1.06 (0.70)   | 1.03 (0.70)    | 1.03 (0.71)    | -               |
|                   | Peficitinib 100 mg | 0.91 (0.65)  | 0.82 (0.63)   | 0.72 (0.60)    | 0.68 (0.60)    | 0.49 (0.53)     |
|                   | Peficitinib 150 mg | 1.02 (0.62)  | 0.81 (0.62)   | 0.70 (0.57)    | 0.63 (0.56)    | 0.47 (0.51)     |

HAQ DI, Health Assessment Questionnaire-Disability Index; SD, standard deviation

**Supplementary Table 4** Overview of TEAEs from Week 12 to Week 28 (SAF)

|                                                         | Placebo (N=82) | Peficitinib 100 mg (N=167) | Peficitinib 150 mg (N=165) | Placebo to 100 mg at Week 12 (N=37) | Placebo to 150 mg at Week 12 (N=38) | Peficitinib 100 mg + 150 mg (N=332) |
|---------------------------------------------------------|----------------|----------------------------|----------------------------|-------------------------------------|-------------------------------------|-------------------------------------|
| All TEAEs                                               | 50 (61.0)      | 95 (56.9)                  | 104 (63.0)                 | 21 (56.8)                           | 25 (65.8)                           | 199 (59.9)                          |
| Drug-related TEAEs*                                     | 27 (32.9)      | 63 (37.7)                  | 72 (43.6)                  | 16 (43.2)                           | 11 (28.9)                           | 135 (40.7)                          |
| Deaths                                                  | 0              | 0                          | 0                          | 0                                   | 0                                   | 0                                   |
| SAEs                                                    | 2 (2.4)        | 5 (3.0)                    | 3 (1.8)                    | 0                                   | 0                                   | 8 (2.4)                             |
| Drug-related SAEs*                                      | 2 (2.4)        | 3 (1.8)                    | 1 (0.6)                    | 0                                   | 0                                   | 4 (1.2)                             |
| ≥Grade 3 TEAEs†                                         | 5 (6.1)        | 7 (4.2)                    | 6 (3.6)                    | 1 (2.7)                             | 1 (2.6)                             | 13 (3.9)                            |
| TEAE leading to permanent discontinuation of study drug |                |                            |                            |                                     |                                     |                                     |
| All                                                     | 4 (4.9)        | 4 (2.4)                    | 1 (0.6)                    | 0                                   | 0                                   | 5 (1.5)                             |
| Drug-related*                                           | 3 (3.7)        | 3 (1.8)                    | 1 (0.6)                    | 0                                   | 0                                   | 4 (1.2)                             |
| SAEs                                                    | 2 (2.4)        | 2 (1.2)                    | 0                          | 0                                   | 0                                   | 2 (0.6)                             |
| Drug-related SAEs*                                      | 2 (2.4)        | 2 (1.2)                    | 0                          | 0                                   | 0                                   | 2 (0.6)                             |

Treatment-emergent adverse events are defined as any adverse event that started or worsened in severity after initial dose of study drug or reference drug through the follow-up period. SAE, serious adverse event; SAF, safety analysis set; TEAE, treatment-emergent adverse event. All values are n (%).

\*Possible or probable, as assessed by the investigator or records where relationship was missing.

†Based on National Cancer Institute Common Terminology Criteria for Adverse Events (NCI-CTCAE) grade: grade 3 = severe or medically significant, grade 4 = life threatening, grade 5 = death related to AE.

**Supplementary Table 5** Overview of TEAEs from Week 28 to Week 52 or later (SAF)

|                                                         | <b>Peficitinib 100 mg (N=158)</b> | <b>Peficitinib 150 mg (N=158)</b> | <b>Placebo to 100 mg at Week 12 (N=36)</b> | <b>Placebo to 150 mg at Week 12 (N=36)</b> | <b>Placebo to 100 mg at Week 28 (N=39)</b> | <b>Placebo to 150 mg at Week 28 (N=34)</b> | <b>Peficitinib 100 mg + 150 mg (N=316)</b> |
|---------------------------------------------------------|-----------------------------------|-----------------------------------|--------------------------------------------|--------------------------------------------|--------------------------------------------|--------------------------------------------|--------------------------------------------|
| All TEAEs                                               | 114 (72.2)                        | 112 (70.9)                        | 22 (61.1)                                  | 27 (75.0)                                  | 25 (64.1)                                  | 26 (76.5)                                  | 226 (71.5)                                 |
| Drug-related TEAEs*                                     | 72 (45.6)                         | 74 (46.8)                         | 14 (38.9)                                  | 18 (50.0)                                  | 17 (43.6)                                  | 17 (50.0)                                  | 146 (46.2)                                 |
| Deaths                                                  | 0                                 | 0                                 | 0                                          | 0                                          | 1 (2.6) <sup>‡</sup>                       | 0                                          | 0                                          |
| SAEs                                                    | 10 (6.3)                          | 8 (5.1)                           | 2 (5.6)                                    | 1 (2.8)                                    | 1 (2.6)                                    | 1 (2.9)                                    | 18 (5.7)                                   |
| Drug-related SAEs*                                      | 4 (2.5)                           | 5 (3.2)                           | 2 (5.6)                                    | 1 (2.8)                                    | 0                                          | 1 (2.9)                                    | 9 (2.8)                                    |
| ≥Grade 3 TEAEs <sup>†</sup>                             | 15 (9.5)                          | 15 (9.5)                          | 2 (5.6)                                    | 2 (5.6)                                    | 2 (5.1)                                    | 2 (5.9)                                    | 30 (9.5)                                   |
| TEAE leading to permanent discontinuation of study drug |                                   |                                   |                                            |                                            |                                            |                                            |                                            |
| All                                                     | 4 (2.5)                           | 6 (3.8)                           | 3 (8.3)                                    | 2 (5.6)                                    | 2 (5.1)                                    | 0                                          | 10 (3.2)                                   |
| Drug-related*                                           | 1 (0.6)                           | 5 (3.2)                           | 2 (5.6)                                    | 2 (5.6)                                    | 1 (2.6)                                    | 0                                          | 6 (1.9)                                    |
| SAEs                                                    | 3 (1.9)                           | 4 (2.5)                           | 1 (2.8)                                    | 0                                          | 1 (2.6)                                    | 0                                          | 7 (2.2)                                    |
| Drug-related SAEs*                                      | 1 (0.6)                           | 3 (1.9)                           | 1 (2.8)                                    | 0                                          | 0                                          | 0                                          | 4 (1.3)                                    |

Treatment-emergent adverse events are defined as any adverse event that started or worsened in severity after initial dose of study drug or reference drug through the follow-up period. SAE, serious adverse event; SAF, safety analysis set; TEAE, treatment-emergent adverse event. All values are n (%).

\*Possible or probable, as assessed by the investigator or records where relationship was missing.

<sup>†</sup>Based on National Cancer Institute Common Terminology Criteria for Adverse Events (NCI-CTCAE) grade: grade 3 = severe or medically significant, grade 4 = life threatening, grade 5 = death related to AE.



‡A 69-year-old male patient who was switched from placebo to peficitinib 100 mg at Week 28 committed suicide at Day 323 (Week 46). The patient had a history of depression and the death was considered unrelated to study drug.

## SUPPLEMENTARY FIGURES

## Supplementary Figure 1 Study design

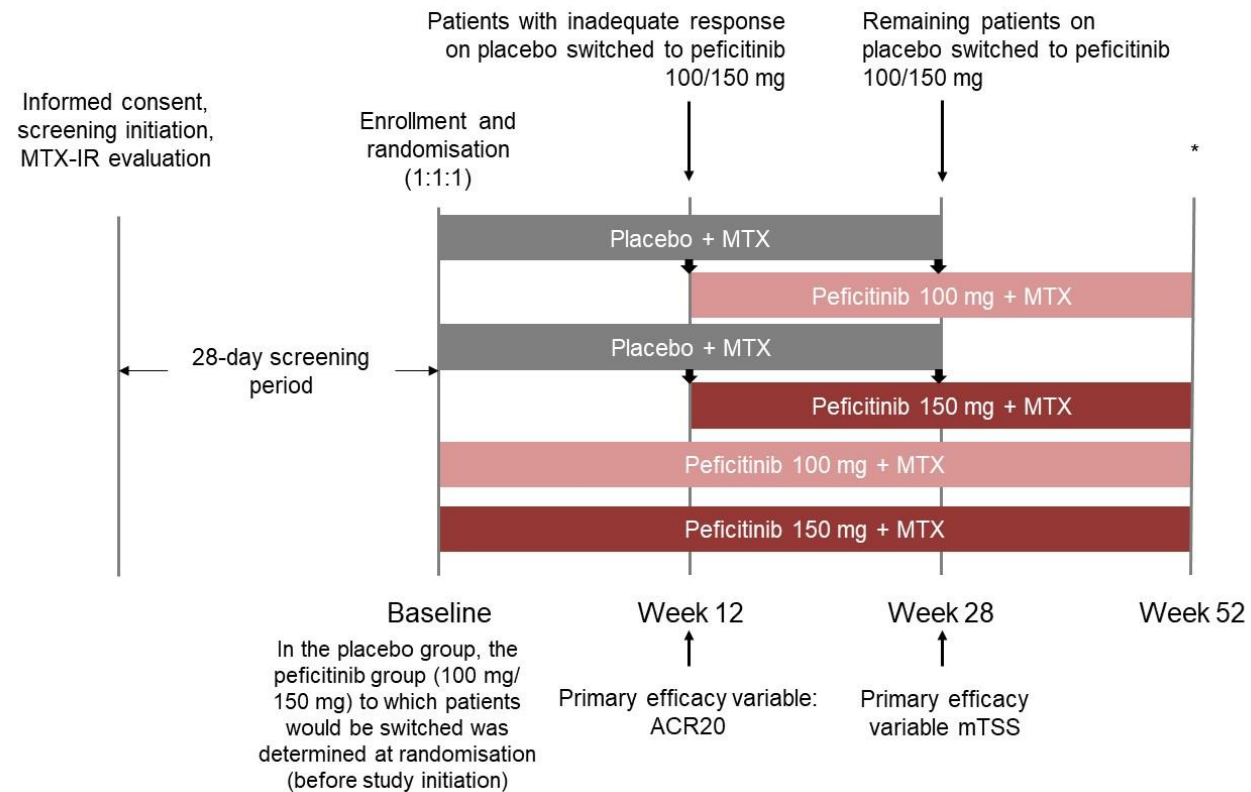

[Footnote for Supplementary Figure 1]

IR, inadequate responder

\*Patients completing the study enrolled into the open-label extension study. Patients who did not proceed to the extension study underwent follow-up observation 4 weeks after the end of the study treatment.

**Supplementary Figure 2** Proportions of patients showing a change from baseline in mTSS **A\leq 0 and **B**)  $\geq 3$  at Week 28/ET and Week 52/ET (linear extrapolation) (FAS)**

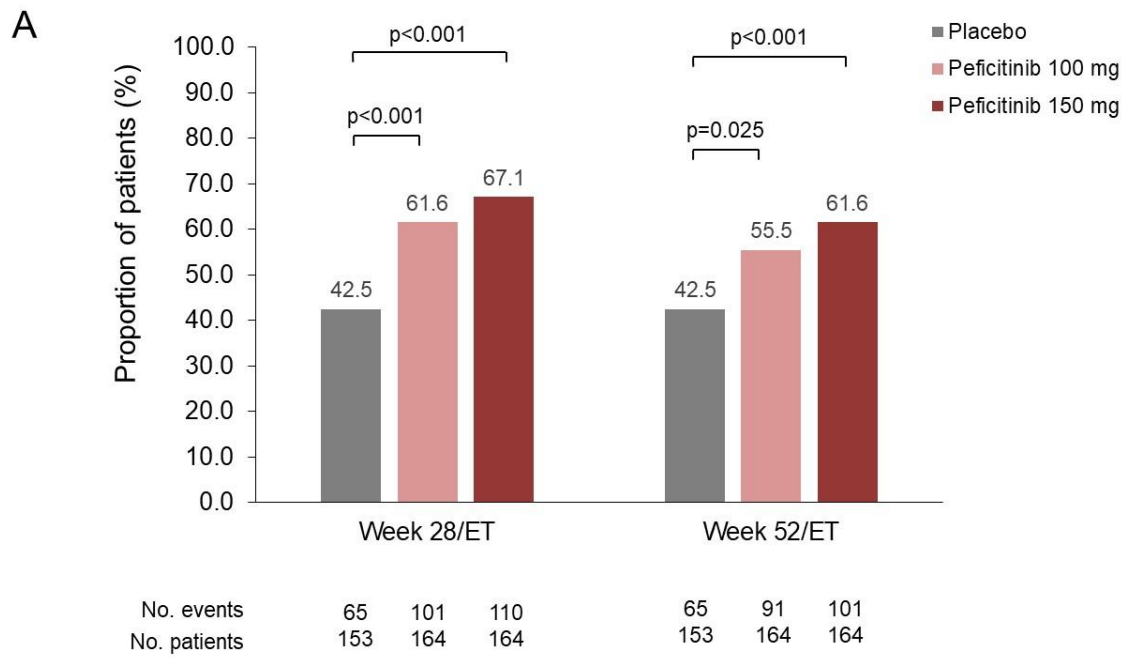

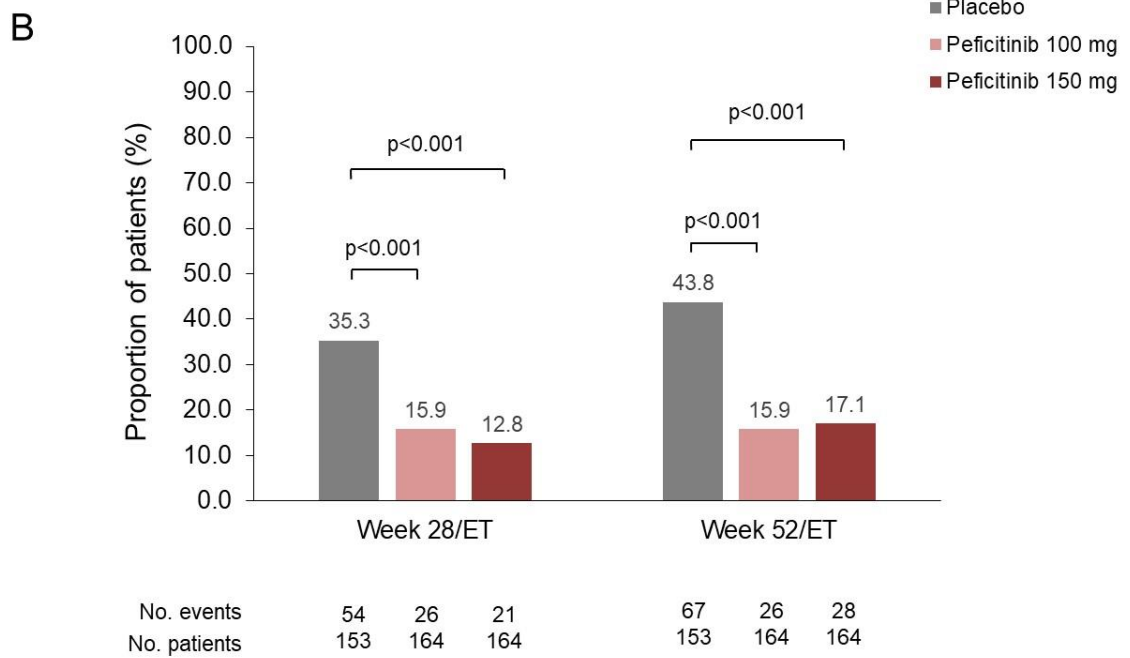

**Supplementary Figure 3** Proportions of patients achieving **a)** CDAI score  $\leq 2.8$ , **B)** CDAI score  $\leq 10$ , **C)** SDAI score  $\leq 3.3$  and **D)** SDAI score  $\leq 11$  at Week 12/ET, Week 28/ET and Week 52/ET (linear extrapolation) (FAS)

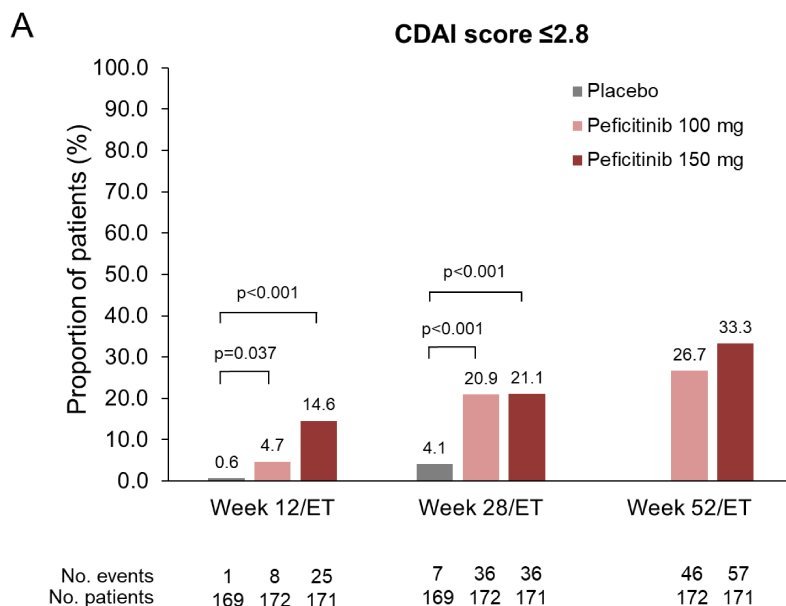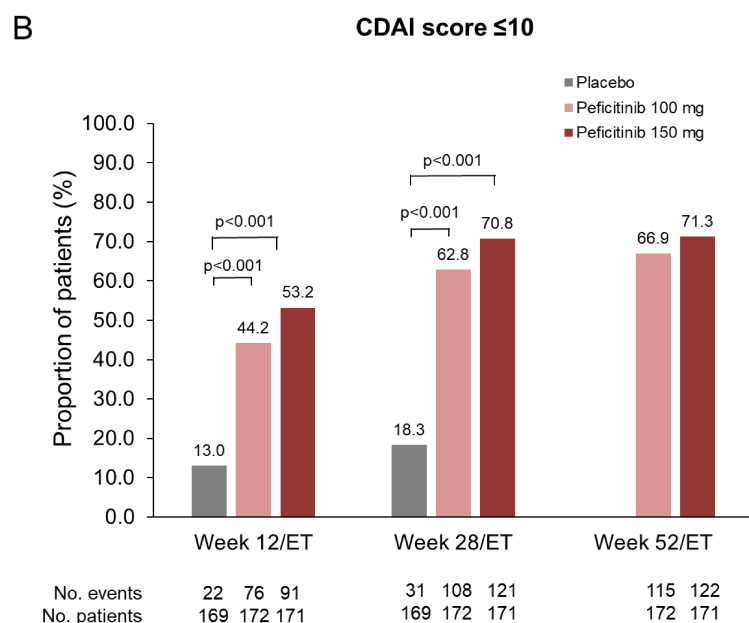

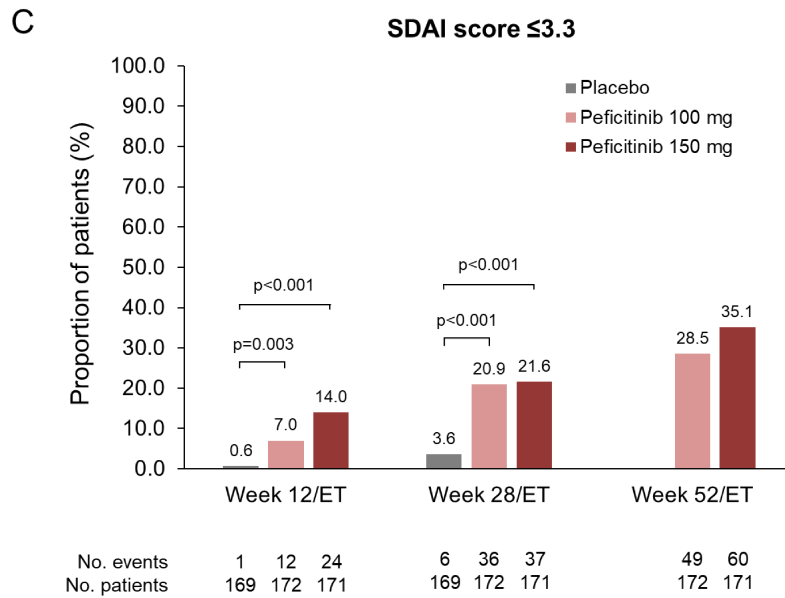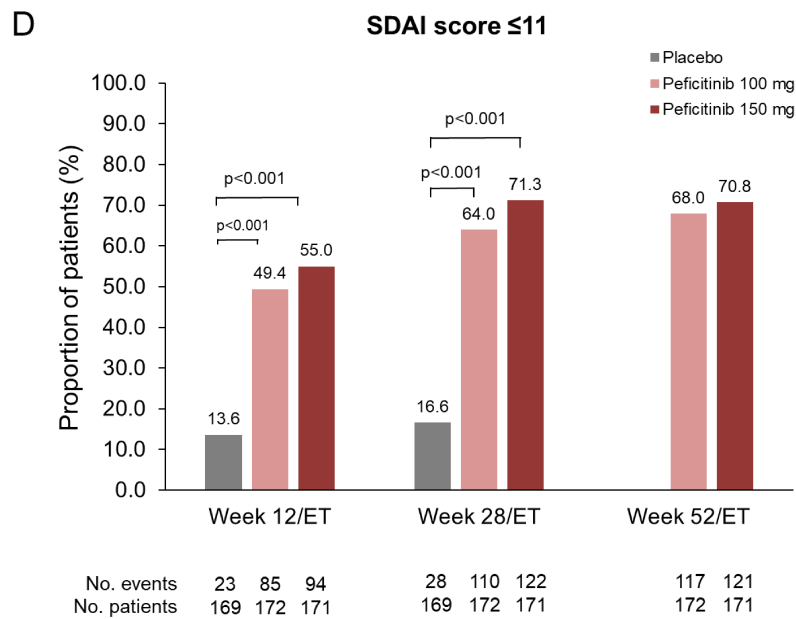

[Footnote applies to all parts of Supplementary Figure 3]

P values were determined using Fisher's exact test with no multiplicity adjustment.





**Supplementary Figure 4 A) ACR20, B) ACR50, and C) ACR70 responses over time (FAS)**

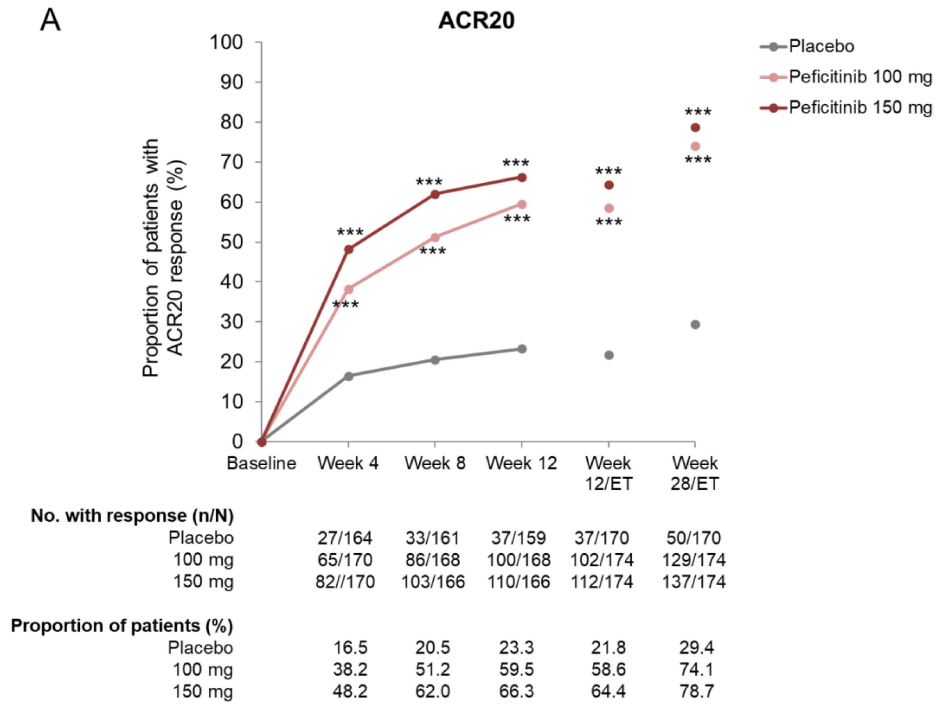

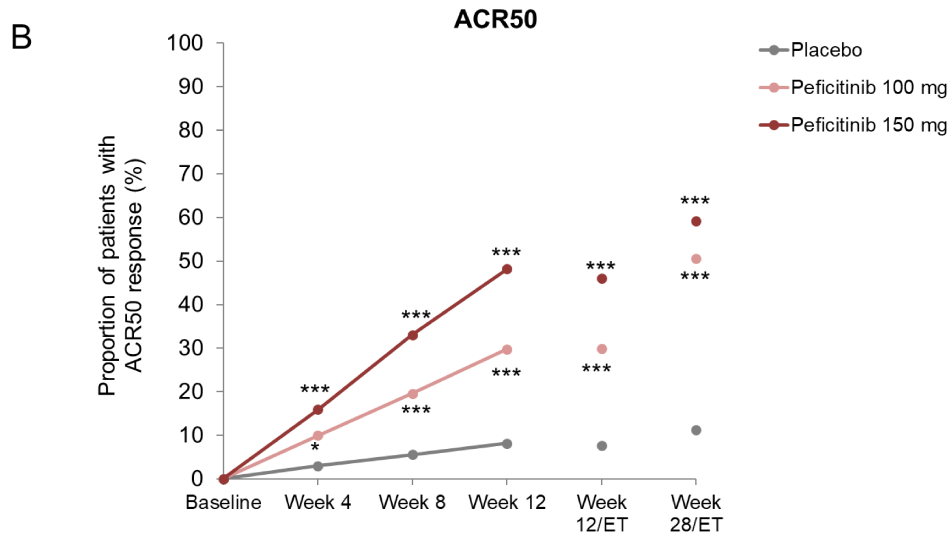

| No. with response (n/N) |  | Week 4 | Week 8 | Week 12 | Week 12/ET | Week 28/ET |
|-------------------------|--|--------|--------|---------|------------|------------|
| Placebo                 |  | 5/164  | 9/161  | 13/159  | 13/170     | 19/170     |
| 100 mg                  |  | 17/170 | 33/168 | 50/168  | 52/174     | 88/174     |
| 150 mg                  |  | 27/170 | 55/166 | 80/166  | 80/174     | 103/174    |

  

| Proportion of patients (%) |  | Week 4 | Week 8 | Week 12 | Week 12/ET | Week 28/ET |
|----------------------------|--|--------|--------|---------|------------|------------|
| Placebo                    |  | 3.0    | 5.6    | 8.2     | 7.6        | 11.2       |
| 100 mg                     |  | 10.0   | 19.6   | 29.8    | 29.9       | 50.6       |
| 150 mg                     |  | 15.9   | 33.1   | 48.2    | 46.0       | 59.2       |

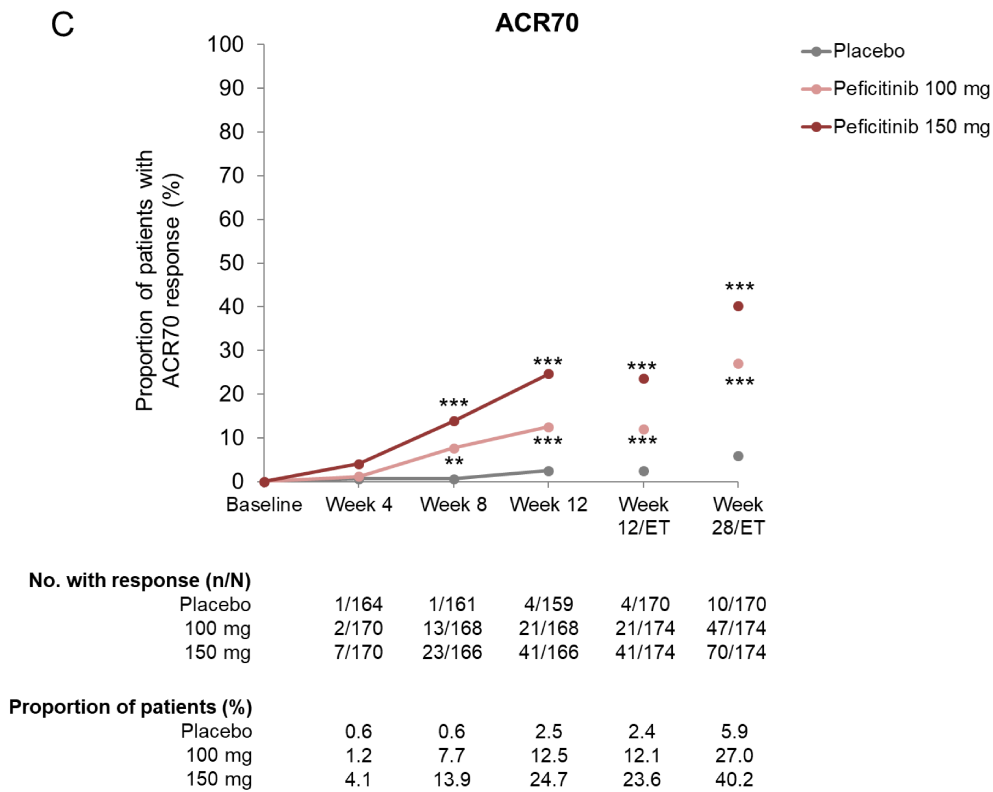

[Footnote applies to all parts of Supplementary Figure 4]

\* $p < 0.05$ ; \*\* $p < 0.01$ ; \*\*\* $p < 0.001$

**Supplementary Figure 5** Change from baseline over time in **A) CDAI score** and **B) SDAI score (FAS)**

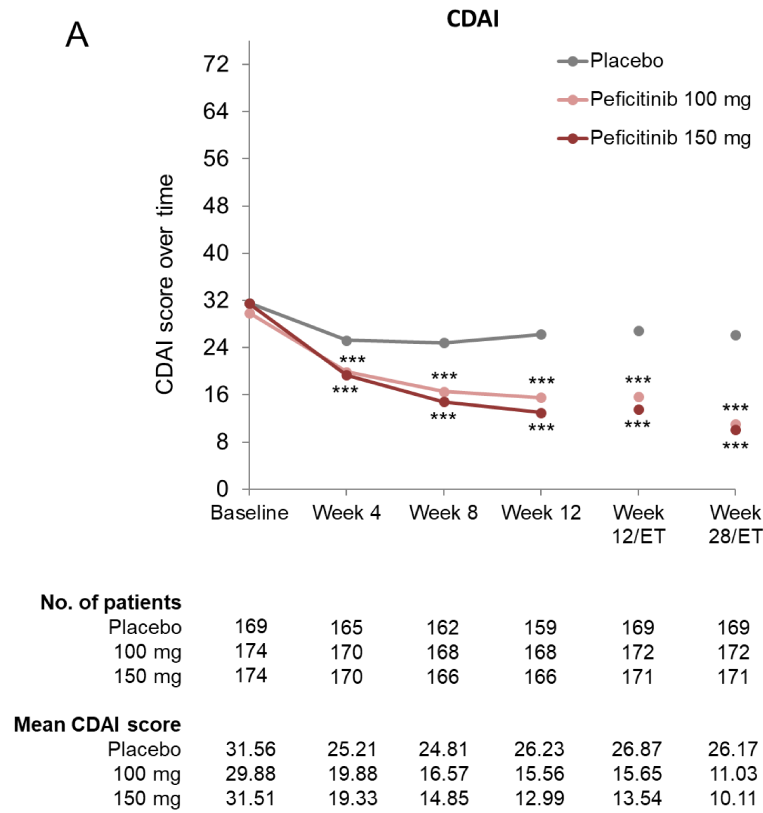

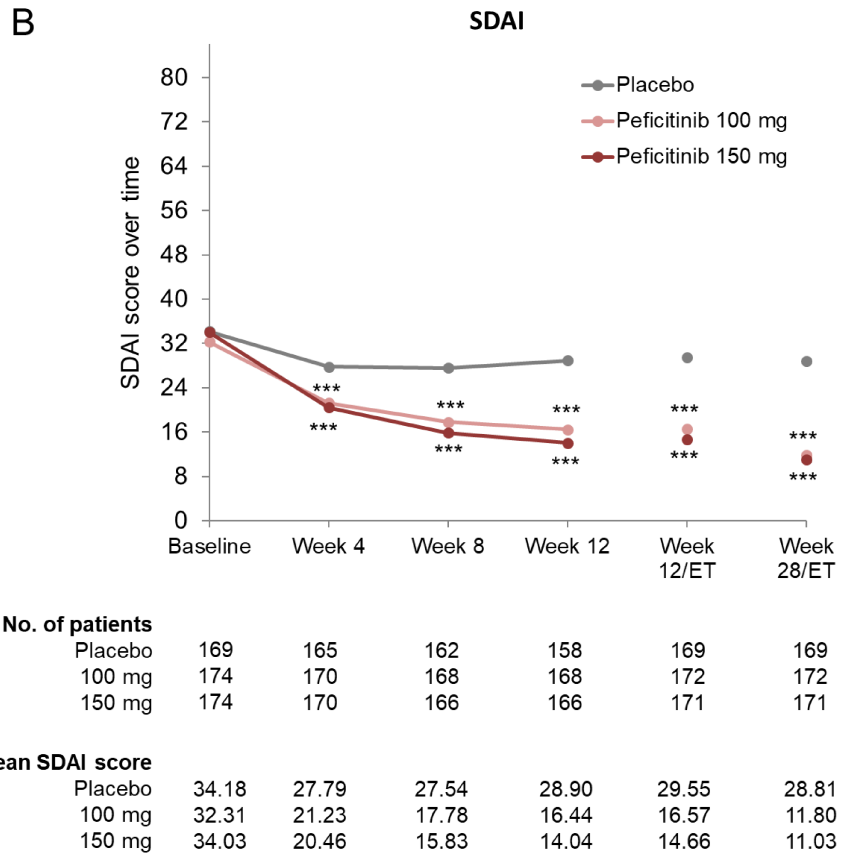

[Footnote applies to both parts of Supplementary Figure 5]

\* $p < 0.05$ , \*\* $p < 0.01$ , \*\*\* $p < 0.001$

Figures show observed data for Weeks 0 to 12 and LOCF for Week 12/ET and 28/ET. P values derived from Fisher's exact test with no multiplicity adjustment, except for ACR20 response rates at Week12/ET, for which a closed testing procedure was used for multiplicity adjustment.

**Supplementary Figure 6** Proportion of patients achieving **A) DAS28-CRP <2.6, B) DAS28-ESR <2.6 and C) DAS28-CRP ≤3.2**, at Week 12/ET, Week 28/ET and Week 52/ET (EOT) (FAS)

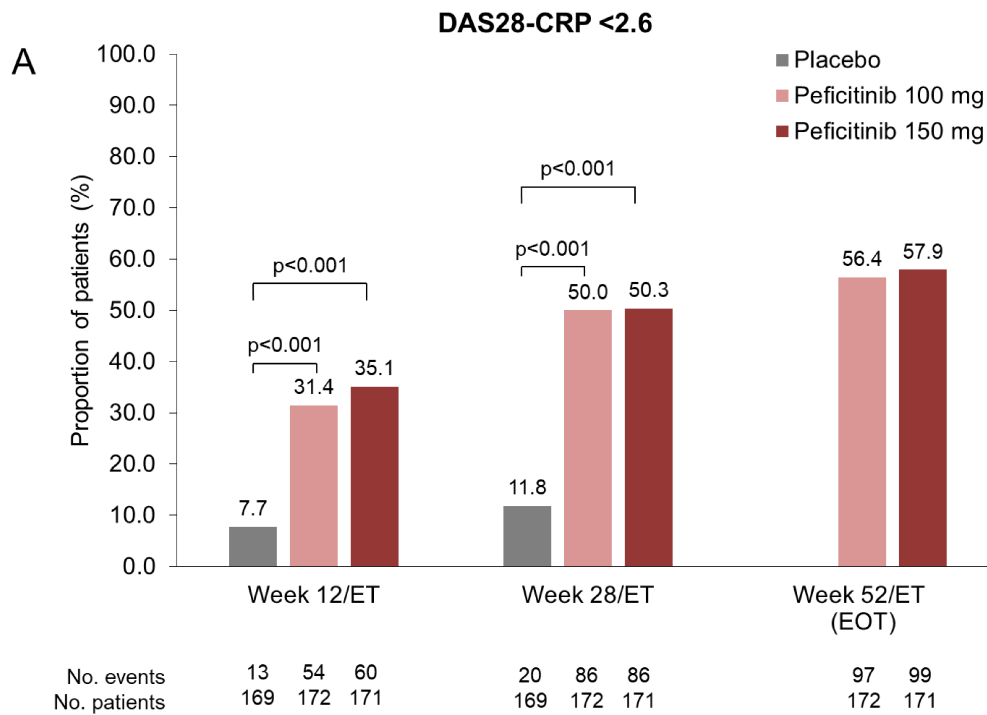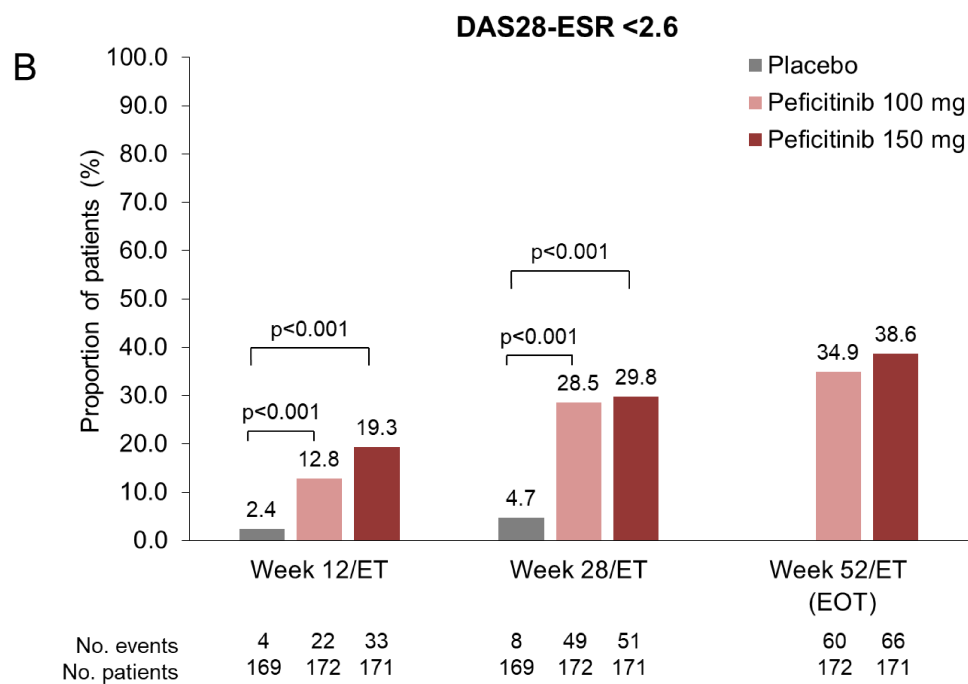

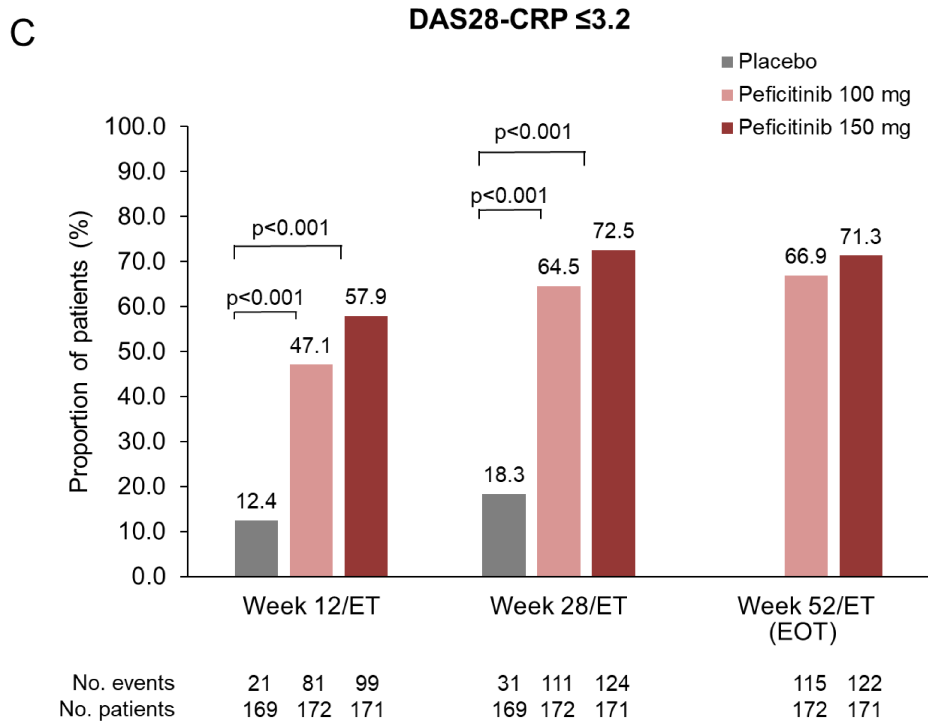

[Footnote applies to all parts of Supplementary Figure 6]

Figures show data for last observation carried forward derived from an imputation method. Statistical comparisons were not conducted for Week 52/ET data. P values were derived from Fisher's exact test with no multiplicity adjustment.

## 1 LIST OF STUDY CENTRES

- 2 Please note that all the sites are located in Japan.
- 3 Medical Corporation Association Osaki Internal Clinic
- 4 Medical Corporation Association Sagawa Akira Rheumatology Clinic
- 5 Sapporo City General Hospital
- 6 General Incorporated Foundation Hikarigaoka-Aiseikai Hikarigaoka Spellman Hospital
- 7 Medical Corporation Heizenkai Ohno Clinic
- 8 Medical Corporation Association Kojokai, Hirose Clinic
- 9 Honjo Rheumatism Clinic
- 10 Medical Corporation Kojunikai Osaka Rehabilitation Hospital
- 11 Hiroshima Red Cross Hospital & Atomic-bomb Survivors Hospital
- 12 Medical Corporation Hiroshima Rheumatology Clinic
- 13 Medical Corporation SORR Shigenobu Orthopedic Rheumatism and Rehabilitation Clinic
- 14 Medical Corporation Association Aiaikai Ishioka Clinic
- 15 Medical Corporation Koyukai Oribe Rheumachika Naika Clinic
- 16 Shono Rheumatism Clinic
- 17 National Hospital Organization Kumamoto Saishunso National Hospital
- 18 National Hospital Organization Kyushu Medical Center
- 19 Social Medical Corporation Association Kumamoto-Marutakai Kumamoto Orthopaedic
- 20 Hospital
- 21 Medical Corporation Jiyukai Yu-Family Clinic
- 22 National University Corporation Tokyo Medical And Dental University Medical Hospital
- 23 Nagaoka Red Cross Hospital
- 24 Medical Corporation Association Katayama Orthopedic Rheumatology Clinic
- 25 Medical Corporation Izumiyamakai East Sendai Rheumatism and Internal Medicine Clinic
- 26 National University Corporation Hokkaido University Hospital
- 27 Institute of Rheumatology, Tokyo Women's Medical University
- 28 Medical Corporation Inoue Hospital
- 29 Medical Corporation Koseikai Kuroda Orthopedic Hospital
- 30 Medical Corporation Association Aoikai Sendai Taihaku Hospital
- 31 Nagoya University Hospital
- 32 Medical Corporation Seijinkai Hokkaido Medical Center for Rheumatic Diseases
- 33 University of Tsukuba Hospital
- 34 Hospital of the University of Occupational and Environmental Health, Japan
- 35 Matsubara Mayflower Hospital
- 36 Medical Corporation Association Matsubara Clinic
- 37 National University Corporation The University of Tokyo Hospital
- 38 Medical Corporation Association Shizuoka Miyake Orthopedic Clinic
- 39 Medical Corporation Association Katokukai Kang Rheumatism and Orthopedic Clinic
- 40 Kumamoto Rheumatology Clinic
- 41 Medical Corporation Daimyokai Miyasato Clinic
- 42 Kawasaki Municipal Hospital
- 43 Komagamine Rheumatoid Orthopaedic Clinic
- 44 Medical Corporation Association Koshinkai Ohira Orthopaedic Hospital
- 45 Osafune Clinic
- 46 Medical Corporation Rheumatology Kenkeikai Azuma Rheumatology Clinic
- 47 Sugimoto Clinic
- 48 Social Welfare Organization Saiseikai Imperial Gift Foundation, Inc. Mito Saiseikai General
- 49 Hospital
- 50 Medical Corporation Seiwakai Hiroshima Clinic
- 51 Specific Medical Corporation Seijinkai Okubo Hospital
- 52 Medical Corporation Kakuseikai Tsurukami Orthopedic Rheumatism Clinic



- 53 Medical Corporation Association Kawasaki Rheumatism & Internal Medicine Clinic
- 54 National Hospital Organization Kyushu Medical Center
- 55 Ogawa Internal Medicine Clinic
- 56 National Hospital Organization Toneyama National Hospital
- 57 Medical Corporation Ishinkai Kaneko Internal and Rheumatoid Clinic
- 58 Medical Corporation Association Seisenkai Fujimori Clinic
- 59 National Hospital Organization Beppu Medical Center
- 60 Medical Corporation Seiryukai Eiraku Clinic
- 61 Suzuki Clinic
- 62 National Hospital Organization Fukuoka Hospital
- 63 Aichi Koseiren Kainan Hospital
- 64 National Hospital Organization Himeji Medical Center
- 65 Social Welfare Organization Saiseikai Imperial Gift Foundation, Inc. Osaka Saiseikai Suita  
66 Hospital
- 67 Social Medical Corporation Yukinoseibokai St. Mary's Hospital
- 68 National Hospital Organization Tokyo Medical Center
- 69 Japanese Red Cross Koga Hospital
- 70 Japanese Red Cross Kagoshima Hospital
- 71 National Hospital Organization Ureshino Medical Center
- 72 Kyushu Central Hospital of the Mutual Aid Association of Public School Teachers
- 73 Kamituga Koseiren Kamituga General Hospital
- 74 National Hospital Organization Osaka Minami Medical Center
- 75 Local Incorporated Administrative Agency Nagano Municipal Hospital
- 76 Japanese Red Cross Medical Center
- 77 Tokai University Hospital
- 78 University Hospital Kyoto Prefectural University of Medicine
- 79 National University Corporation Osaka University Hospital
- 80 Okayama University Hospital
- 81 Kagawa University Hospital
- 82 Medical Corporation Association R&O Shizuoka Rheumatism Orthopedic Rehabilitation  
83 Hospital
- 84 Social Welfare Corporation Hakodate Koseiin Hakodate Goryokaku Hospital
- 85 Soshigaya Okura Clinic
- 86 National University Corporation Kobe University Hospital
- 87 Medical Corporation Ryokufukai Misato Marine Hospital
- 88 Medical Corporation Hinouekai Higami Hospital
- 89 Social Welfare Corporation Mitsui Memorial Hospital
- 90 Yokohama City Minato Red Cross Hospital
- 91 Medical Corporation Gotokai Nagasaki Medical Hospital of Rheumatology
- 92 Public interest incorporated foundation Sasaki Institute Kyoundo Hospital
- 93 Medical Corporation Association Hoyokai Matsuta Internal Clinic
- 94 National Hospital Organization Nagasaki Medical Center
- 95 Miyashita Rheumatology Clinic
- 96 Medical Corporation Tokito Clinic Rheumatology & Orthopaedic Surgery
- 97 Medical Corporation Soshikai Munakata Yasuhiko Clinic
- 98 Medical Corporation Inokuchi Clinic
- 99 Medical Corporation Shureikai Oasis Clinic
- 100 National Hospital Organization Toyohashi Medical Center
- 101 National Hospital Organization Nagoya Medical Center
- 102 Medical Corporation Tokushukai Fukuoka Tokushukai Medical Center
- 103 Japanese Red Cross Nagasaki Genbaku Hospital
- 104 General incorporated foundation Konankai Konan Kakogawa Hospital
- 105 Federation of National Public Service Personnel Mutual Aid Associations Tonan Hospital
- 106 Social Welfare Corporation Saiseikai Imperial Gift Foundation, Inc. Chibaken Saiseikai  
107 Narashino Hospital

- 108 Hyogo College Of Medicine Hospital
- 109 Japanese Red Cross Okayama Hospital
- 110 Federation of National Public Service Personnel Mutual Aid Associations Shinkokura
- 111 Hospital
- 112 Aso Iizuka Hospital
- 113 Social Medical Corporation Zenjinkai Shiminnomori Hospital
- 114 Japanese Red Cross Kyoto Daiichi Hospital
- 115 Medical Corporation Association Hoseikai Oki Medical Clinic
- 116 Kushiro Red Cross Hospital
- 117 Social Medical Corporation Sokokai Gyoda General Hospital Gyoda Clinic
- 118 Social Welfare Corporation St. Teresa's Society St. Joseph's Hospital
- 119 Social Medical Corporation Hoseikai Marunouchi Hospital
- 120 Independent Administrative Agency Japan Organization of Occupational Health and Safety
- 121 Chubu Rosai Hospital
- 122 Federation of National Public Service Personnel Mutual Aid Associations Hamanomachi
- 123 Hospital
- 124 Kakegawa City and Fukuroi Hospital Companies Orchestra Middle East far-General Medical
- 125 Center
- 126 Local Incorporated Administrative Agency Higashiosaka City Medical Center
- 127 Japanese Red Cross Shizuoka Hospital
- 128 Japan Mutual Aid Association of Public School Teachers Kinki Central Hospital
- 129 Kindai University Sakai Hospital
- 130 National Hospital Organization Shimoshizu Hospital
- 131 National University Corporation Toyama University Hospital
- 132 Fujita Health University Hospital
- 133 National Hospital Organization Sagami National Hospital
- 134 Incorporated Educational Institution, St. Luke's International University, St. Luke's
- 135 International Hospital
- 136 National University Corporation The University of Tokyo Hospital
- 137 Niigata Rheumatic Center
- 138 Jichi Medical University Hospital
- 139 National University Corporation Osaka University Hospital
- 140 Nagasaki University Hospital
- 141 Toho University Omori Medical Center
- 142 Juntendo University Hospital
- 143 Osaka City University Hospital
- 144 National University Corporation Tohoku University Hospital
- 145 Nippon Medical School Hospital
- 146 Social Medical Corporation Foundation Hakujuikai Sasebo Chuo Hospital
- 147 National University Corporation Kobe University Hospital
- 148 Shirahama Foundation for Health and Welfare Shirahama Hamayu Hospital
- 149 JA Aichi Koseiren Toyota Kosei Hospital
- 150 Osaka Rheumatology Clinic
- 151 NTT-East Sapporo Hospital
- 152 Kyoto University Hospital
- 153 Saitama Medical Center
- 154 Independent Administrative Agency Japan Community Health care Organization Isahaya
- 155 General Hospital
- 156 Medical Corporation Association Yamanakai Higashi-Hiroshima Memorial Hospital
- 157 Kyushu University Hospital
- 158 Social Medical Corporation Fukushima Koseikai Fukushima Daiichi Hospital
- 159 Funabashi Municipal Medical Center
- 160 Medical Corporation Nagamine Orthopedic Clinic
- 161 Independent Administrative Agency Japan Community Health care Organization Yokkaichi
- 162 Hazu Medical Center

- 163 Osaki Citizen Hospital
- 164 Toyohashi Municipal Hospital
- 165 Social Medical Corporation Shinkokinenkai, Shinko Hospital
- 166 Japanese Red Cross Kitami Hospital
- 167 Medical Corporation Fukumankai Morita Internal Medicine Clinic
- 168 Japanese Red Cross Society Nagano Hospital
- 169 Social Medical Corporation Koujunkai Daido Clinic
- 170 Sugimoto Rheumatology and Internal Medicine Clinic
- 171 Independent Administrative Agency Japan Community Health Care Organization Osaka  
172 Hospital
- 173 Medical Corporation Seiryukai Miyashima RA & Orthopaedic Clinic
- 174 Medical Corporation Association Sakurakai Morita Hospital
- 175 Asahi General Hospital
- 176 Hitachi, Ltd. Hitachinaka General Hospital
- 177
